# Supplementary material
Source: PubMed Central journal article supplement (PMC2373424)
Supplement: JCI0627987sd.pdf [file JCI0627987sd.pdf]

## Supplementary references

- S1. Elhage, R., Arnal, J.F., Pieraggi, M.T., Duverger, N., Fievet, C., Faye, J.C., and Bayard, F. 1997. 17 beta-estradiol prevents fatty streak formation in apolipoprotein E-deficient mice. *Arterioscler Thromb Vasc Biol* 17:2679-2684.
- S2. Hodgin, J.B., Kregge, J.H., Reddick, R.L., Korach, K.S., Smithies, O., and Maeda, N. 2001. Estrogen receptor alpha is a major mediator of 17beta-estradiol's atheroprotective effects on lesion size in Apoe<sup>-/-</sup> mice. *J Clin Invest* 107:333-340.
- S3. Chen, Z., Yuhanna, I.S., Galcheva-Gargova, Z., Karas, R.H., Mendelsohn, M.E., and Shaul, P.W. 1999. Estrogen receptor {alpha} mediates the nongenomic activation of endothelial nitric oxide synthase by estrogen. *J. Clin. Invest.* 103:401-406.
- S4. Chambliss, K.L., and Shaul, P.W. 2002. Estrogen Modulation of Endothelial Nitric Oxide Synthase. *Endocr Rev* 23:665-686.
- S5. Sudhir, K., Chou, T.M., Messina, L.M., Hutchison, S.J., Korach, K.S., Chatterjee, K., and Rubanyi, G.M. 1997. Endothelial dysfunction in a man with disruptive mutation in oestrogen-receptor gene. *Lancet* 349:1146-1147.
- S6. Sudhir, K., Chou, T.M., Chatterjee, K., Smith, E.P., Williams, T.C., Kane, J.P., Malloy, M.J., Korach, K.S., and Rubanyi, G.M. 1997. Premature coronary artery disease associated with a disruptive mutation in the estrogen receptor gene in a man. *Circulation* 96:3774-3777.
- S7. Rubanyi, G.M., Freay, A.D., Kauser, K., Sukovich, D., Burton, G., Lubahn, D.B., Couse, J.F., Curtis, S.W., and Korach, K.S. 1997. Vascular Estrogen Receptors and Endothelium-derived Nitric Oxide Production in the Mouse Aorta . Gender Difference and Effect of Estrogen Receptor Gene Disruption. *J. Clin. Invest.* 99:2429-2437.
- S8. Karas, R.H., Hodgin, J.B., Kwoun, M., Kregge, J.H., Aronovitz, M., Mackey, W., Gustafsson, J.A., Korach, K.S., Smithies, O., and Mendelsohn, M.E. 1999. Estrogen inhibits the vascular injury response in estrogen receptor beta-deficient female mice. *Proc Natl Acad Sci U S A* 96:15133-15136.
- S9. Pare, G., Krust, A., Karas, R.H., Dupont, S., Aronovitz, M., Chambon, P., and Mendelsohn, M.E. 2002. Estrogen Receptor-{alpha} Mediates the Protective Effects of Estrogen Against Vascular Injury. *Circ Res* 90:1087-1092.
- S10. Brouchet, L., Krust, A., Dupont, S., Chambon, P., Bayard, F., and Arnal, J.F. 2001. Estradiol accelerates reendothelialization in mouse carotid artery through estrogen receptor-alpha but not estrogen receptor-beta. *Circulation* 103:423-428.
- S11. Zhai, P., Eurell, T.E., Cooke, P.S., Lubahn, D.B., and Gross, D.R. 2000. Myocardial ischemia-reperfusion injury in estrogen receptor-alpha knockout and wild-type mice. *Am J Physiol Heart Circ Physiol* 278:H1640-1647.
- S12. Pelzer, T., Loza, P.-A.A., Hu, K., Bayer, B., Dienesch, C., Calvillo, L., Couse, J.F., Korach, K.S., Neyses, L., and Ertl, G. 2005. Increased Mortality and Aggravation of Heart Failure in Estrogen Receptor-{beta} Knockout Mice After Myocardial Infarction. *Circulation* 111:1492-1498.
- S13. Skavdahl, M., Steenbergen, C., Clark, J., Myers, P., Demianenko, T., Mao, L., Rockman, H.A., Korach, K.S., and Murphy, E. 2005. Estrogen receptor-{beta} mediates male-female differences in the development of pressure overload hypertrophy. *Am J Physiol Heart Circ Physiol* 288:H469-476.
- S14. Cooke, P.S., and Naaz, A. 2004. Role of estrogens in adipocyte development and function. *Exp Biol Med (Maywood)* 229:1127-1135.
- S15. Tchernof, A., Calles-Escandon, J., Sites, C.K., and Poehlman, E.T. 1998. Menopause, central body fatness, and insulin resistance: effects of hormone-replacement therapy. *Coron Artery Dis* 9:503-511.
- S16. Mayes, J.S., and Watson, G.H. 2004. Direct effects of sex steroid hormones on adipose tissues and obesity. *Obes Rev* 5:197-216.
- S17. Pedersen, S.B., Bruun, J.M., Hube, F., Kristensen, K., Hauner, H., and Richelsen, B. 2001. Demonstration of estrogen receptor subtypes alpha and beta in human adipose tissue: influences of adipose cell differentiation and fat depot localization. *Mol Cell Endocrinol* 182:27-37.
- S18. Crandall, D.L., Busler, D.E., Novak, T.J., Weber, R.V., and Kral, J.G. 1998. Identification of estrogen receptor beta RNA in human breast and abdominal subcutaneous adipose tissue. *Biochem Biophys Res Commun* 248:523-526.
- S19. Anwar, A., McTernan, P.G., Anderson, L.A., Askaa, J., Moody, C.G., Barnett, A.H., Eggo, M.C., and Kumar, S. 2001. Site-specific regulation of oestrogen receptor-alpha and -beta by oestradiol in human adipose tissue. *Diabetes Obes Metab* 3:338-349.
- S20. Price, T.M., and O'Brien, S.N. 1993. Determination of estrogen receptor messenger ribonucleic acid (mRNA) and cytochrome P450 aromatase mRNA levels in adipocytes and adipose stromal cells by competitive polymerase chain reaction amplification. *J Clin Endocrinol Metab* 77:1041-1045.
- S21. Dieudonne, M.N., Leneuve, M.C., Giudicelli, Y., and Pecquery, R. 2004. Evidence for functional estrogen receptors {alpha} and {beta} in human adipose cells: regional specificities and regulation by estrogens. *Am J Physiol Cell Physiol* 286:C655-661.
- S22. Mizutani, T., Nishikawa, Y., Adachi, H., Enomoto, T., Ikegami, H., Kurachi, H., Nomura, T., and Miyake, A. 1994. Identification of estrogen receptor in human adipose tissue and adipocytes. *J Clin Endocrinol Metab* 78:950-954.
- S23. Rodriguez-Cuenca, S., Monjo, M., Proenza, A.M., and Roca, P. 2005. Depot differences in steroid receptor expression in adipose tissue: possible role of the local steroid milieu. *Am J Physiol Endocrinol Metab* 288:E200-207.
- S24. Couse, J.F., Hewitt, S.C., and Korach, K.S. 2006. Steroid receptors in the ovary and uterus. In *Knobil and Neill: physiology of reproduction*. 3rd Edition. Neill, J.D., editor. Academic Press. New York, New York, USA. 593-678.
- S25. Urabe, M., Yamamoto, T., Kashiwagi, T., Okubo, T., Tsuchiya, H., Iwasa, K., Kikuchi, N., Yokota, K., Hosokawa, K., and Honjo, H. 1996. Effect of estrogen replacement therapy on hepatic triglyceride lipase, lipoprotein lipase and lipids including apolipoprotein E in climacteric and elderly women. *Endocr J* 43:737-742.
- S26. Palin, S.L., McTernan, P.G., Anderson, L.A., Sturdee, D.W., Barnett, A.H., and Kumar, S. 2003. 17Beta-estradiol and anti-estrogen ICI: compound 182,780 regulate expression of lipoprotein lipase and hormone-sensitive lipase in isolated subcutaneous abdominal adipocytes. *Metabolism* 52:383-388.
- S27. Pedersen, S.B., Kristensen, K., Hermann, P.A., Katzenellenbogen, J.A., and Richelsen, B. 2004. Estrogen controls lipolysis by up-regulating alpha2A-adrenergic receptors directly in human adipose tissue through the estrogen receptor alpha. Implications for the female fat distribution. *J Clin Endocrinol Metab* 89:1869-1878.

- S28. Dos Santos, E.G., Dieudonne, M.N., Pecquery, R., Le Moal, V., Giudicelli, Y., and Lacasa, D. 2002. Rapid nongenomic E2 effects on p42/p44 MAPK, activator protein-1, and cAMP response element binding protein in rat white adipocytes. *Endocrinology* 143:930-940.
- S29. Heine, P.A., Taylor, J.A., Iwamoto, G.A., Lubahn, D.B., and Cooke, P.S. 2000. Increased adipose tissue in male and female estrogen receptor-alpha knockout mice. *PNAS* 97:12729-12734.
- S30. Naaz, A., Zakroczymski, M., Heine, P., Taylor, J., Saunders, P., Lubahn, D., and Cooke, P.S. 2002. Effect of ovariectomy on adipose tissue of mice in the absence of estrogen receptor alpha (ERalpha): a potential role for estrogen receptor beta (ERbeta). *Horm Metab Res* 34:758-763.
- S31. Zhao, L., O'Neill, K., and Diaz Brinton, R. 2005. Selective estrogen receptor modulators (SERMs) for the brain: current status and remaining challenges for developing NeuroSERMs. *Brain Res Brain Res Rev* 49:472-493.
- S32. Hess, R.A., Bunick, D., Lee, K.H., Bahr, J., Taylor, J.A., Korach, K.S., and Lubahn, D.B. 1997. A role for oestrogens in the male reproductive system. *Nature* 390:509-512.
- S33. Bollig, A., and Miksicek, R.J. 2000. An estrogen receptor-alpha splicing variant mediates both positive and negative effects on gene transcription. *Mol. Endocrinol* 14:634-649.
- S34. Couse, J.F., Hewitt, S.C., and Korach, K.S. 2006. Steroid receptors in the ovary and uterus. In *Knobil and Neill: Physiology of Reproduction*. Third edition. Academic Press, New York, New York, USA. 593-678.
- S35. McDonnell, D.P., Wijayaratne, A., Chang, C.-Y., and Norris, J.D. 2002. Elucidation of the molecular mechanism of action of selective estrogen receptor modulators. *Am. J. Cardiol* 90: 35F-43F.
